# Supplementary material for: Beneficial Effects of a Low-Glycemic Diet on Serum Metabolites and Gut Microbiota in Obese Women With Prevotella and Bacteriodes Enterotypes: A Randomized Clinical Trial
Source: PubMed Central journal article supplement (PMC9111978; doi:10.3389/fnut.2022.861880), 2022-05-02
Supplement: Image_1.pdf [file Image_1.pdf]

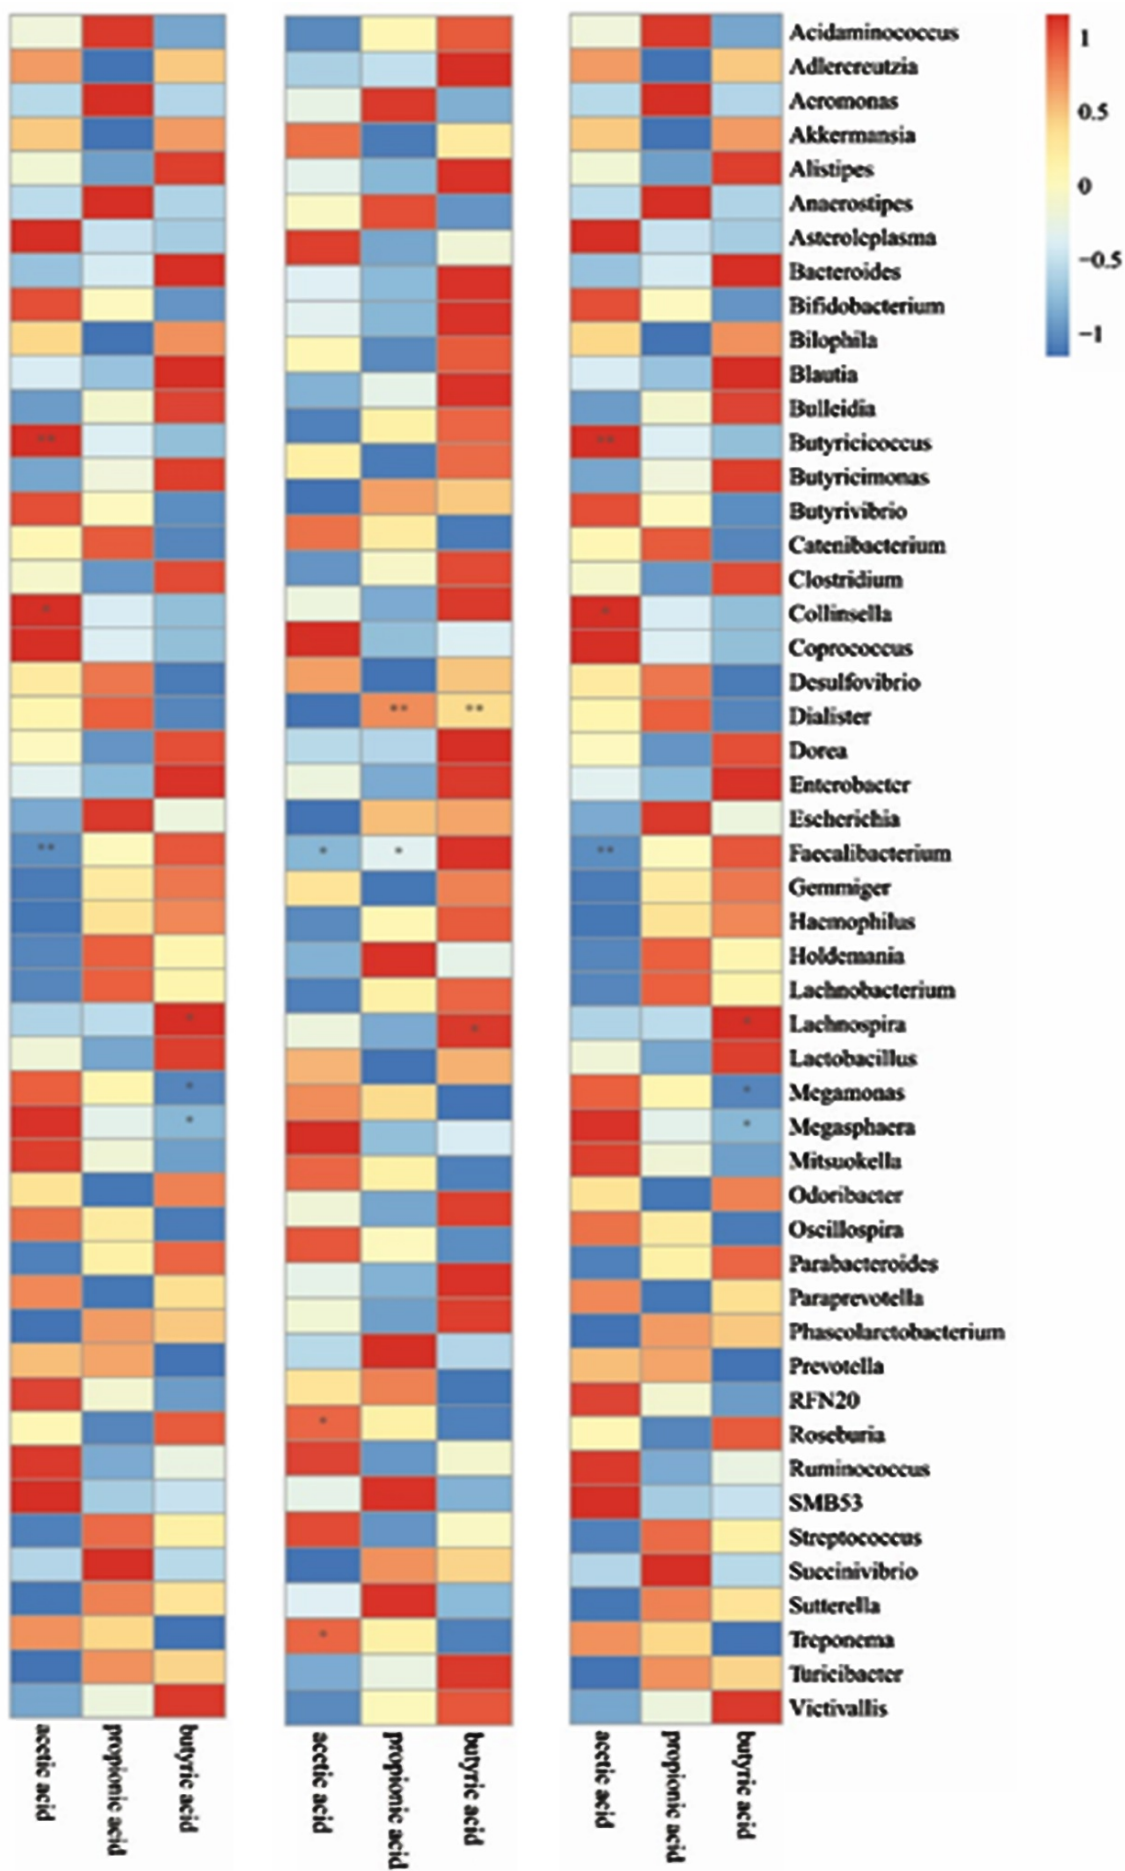

**A. Total participants B. Low-GID C. CD**

Supplemental Fig. 1S. Correlation between serum short-chain fatty acids (acetic acid, propionic acid, and butyric acid) concentrations and fecal bacteria at the genus level according to the diets.

\* Significantly correlated with serum SCFA and fecal bacteria at  $P < 0.05$  \*\* at  $P < 0.01$ .
